# Supplementary material
Source: publisher figshare collection journal article supplement (https://frontiersin.figshare.com/ndownloader/files/22754603)
Supplement: Supplementary file 1 [file 22754603]

**Plate 1** Photographic records for selected wetlands and dams in Mountain Zebra National Park (November 2015)

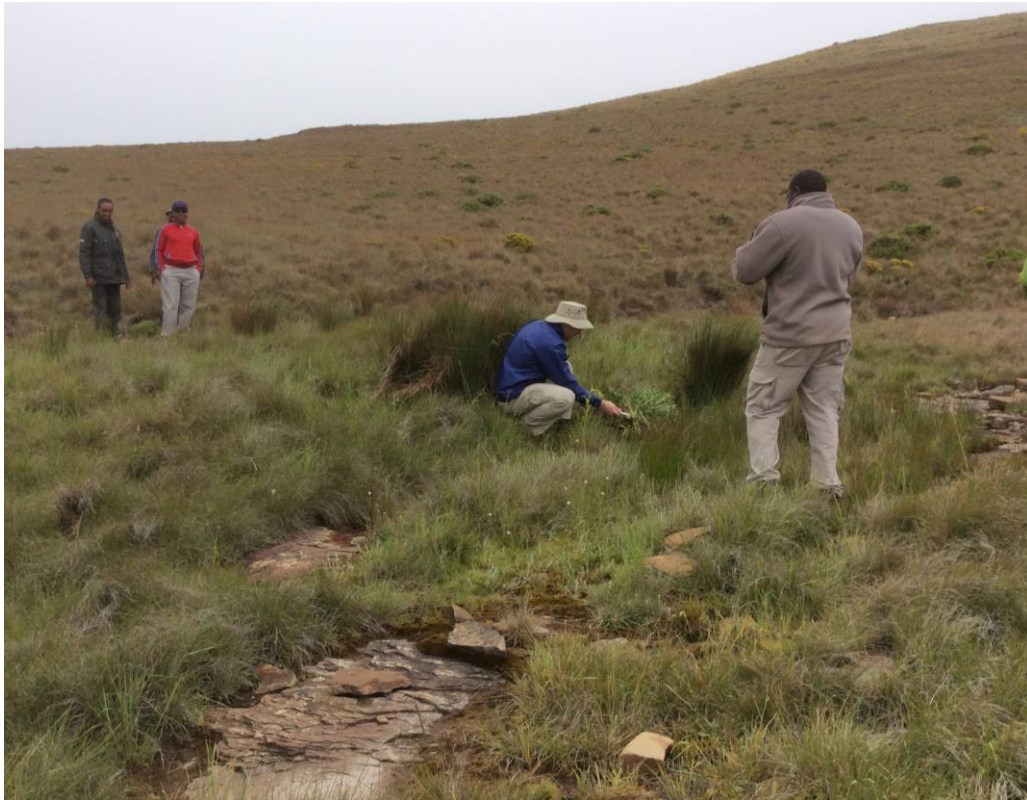

a. Small wetland seep formed on bedrock shelf (-32.31205833 / 25.41130833)

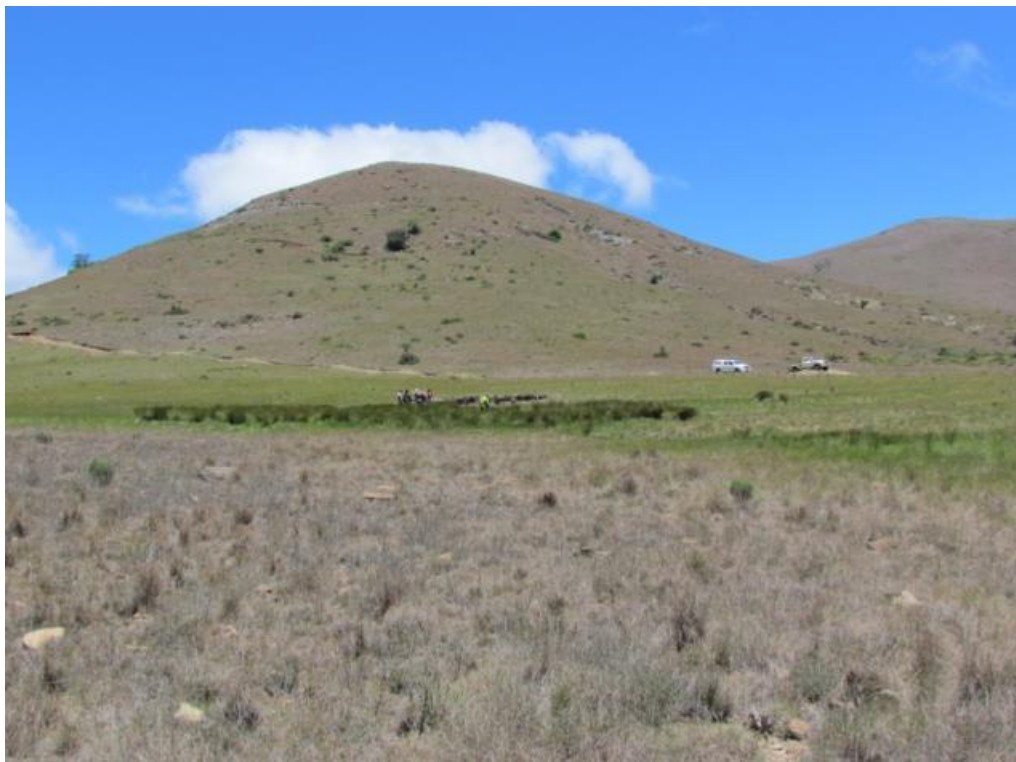

b. Large wetland seep fed by lateral flows through duplex soils (-32.30398056 / 25.41073056)

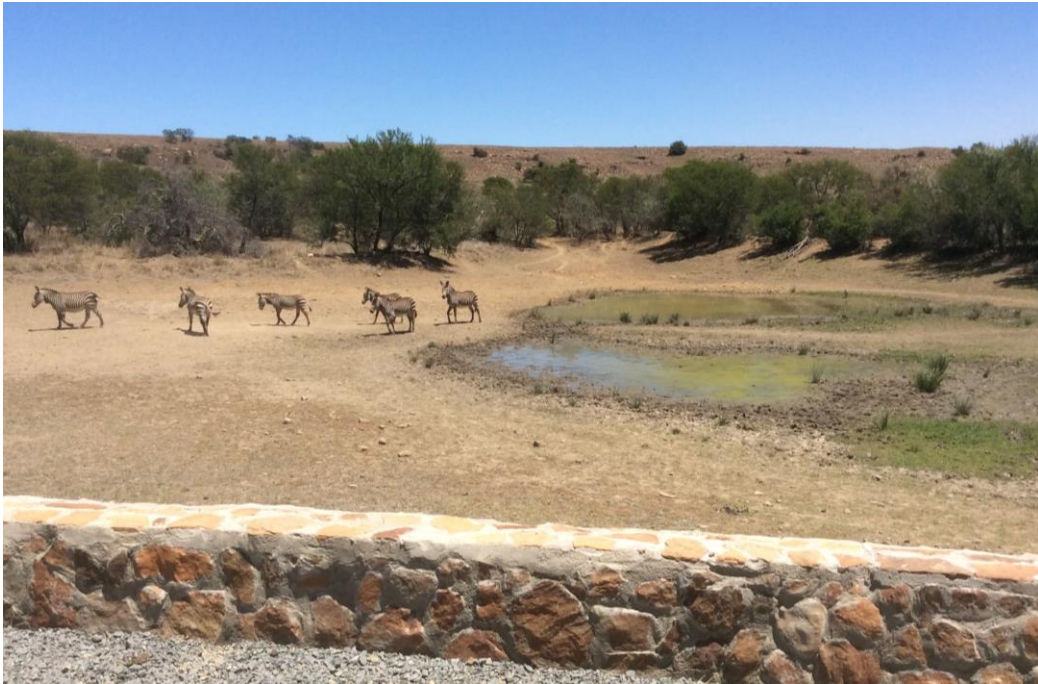

c. Spring with dam wall and zebra (-32.17548333 / 25.42730833)

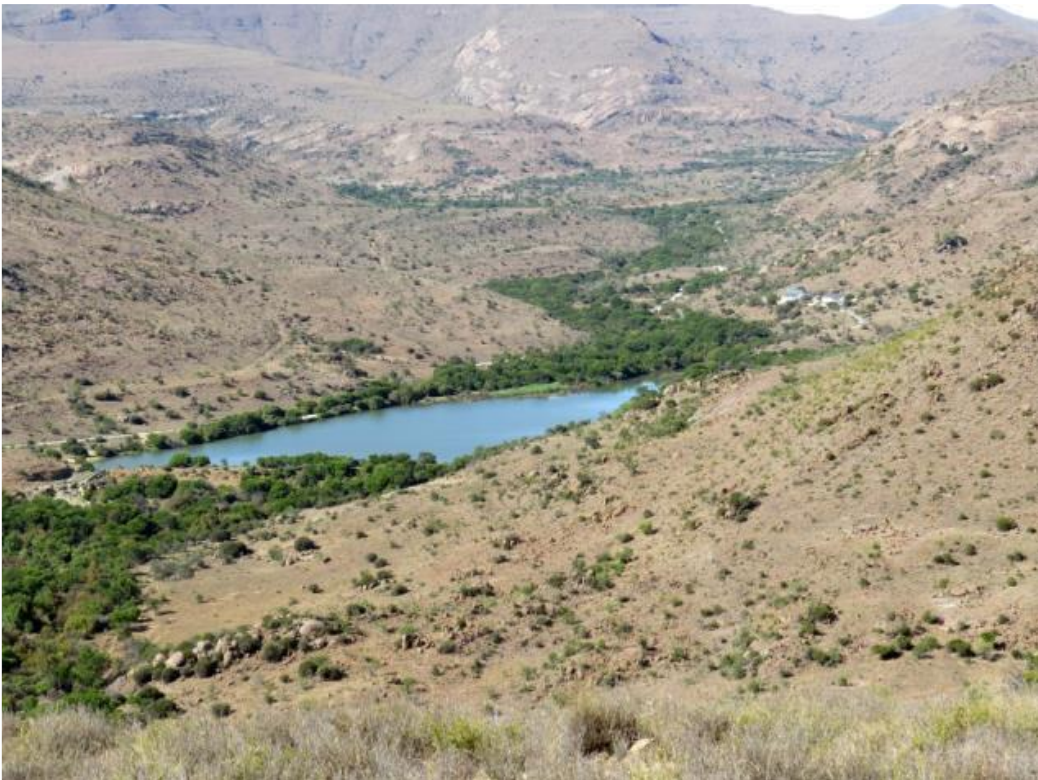

d. Doringhoek Dam on the Wilgerboom River within MZNP (-32.225035 / 25.460700)



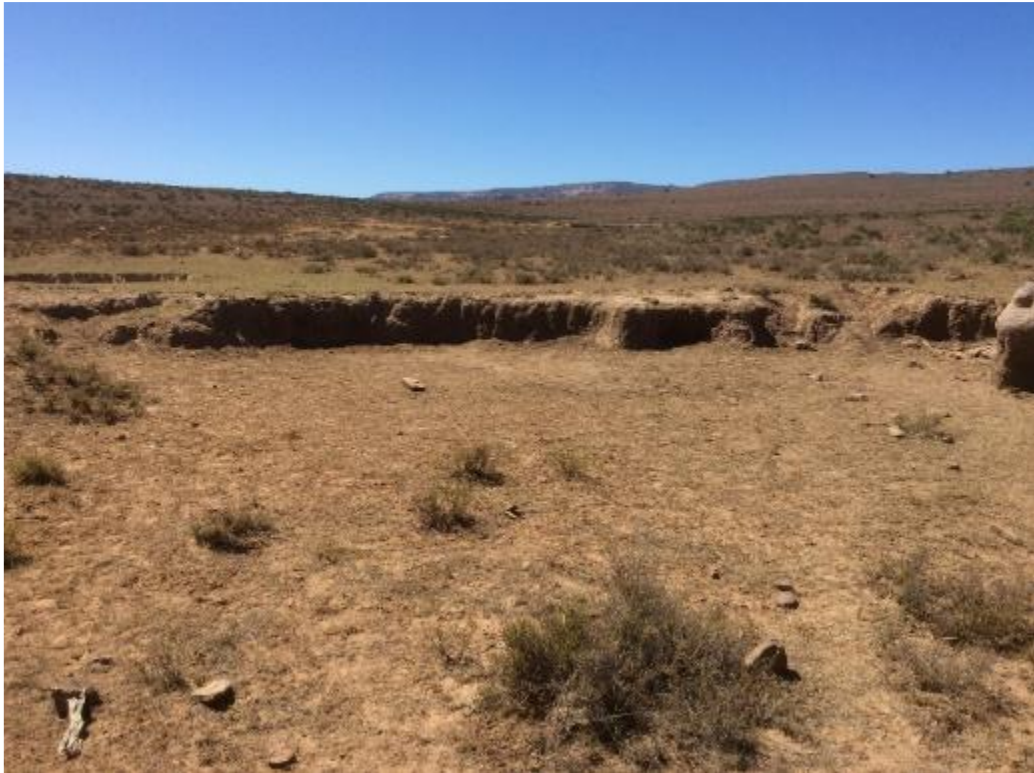

e. Wetland seep that has dessicated due to erosion (-32.21678611 / 25.42033611)

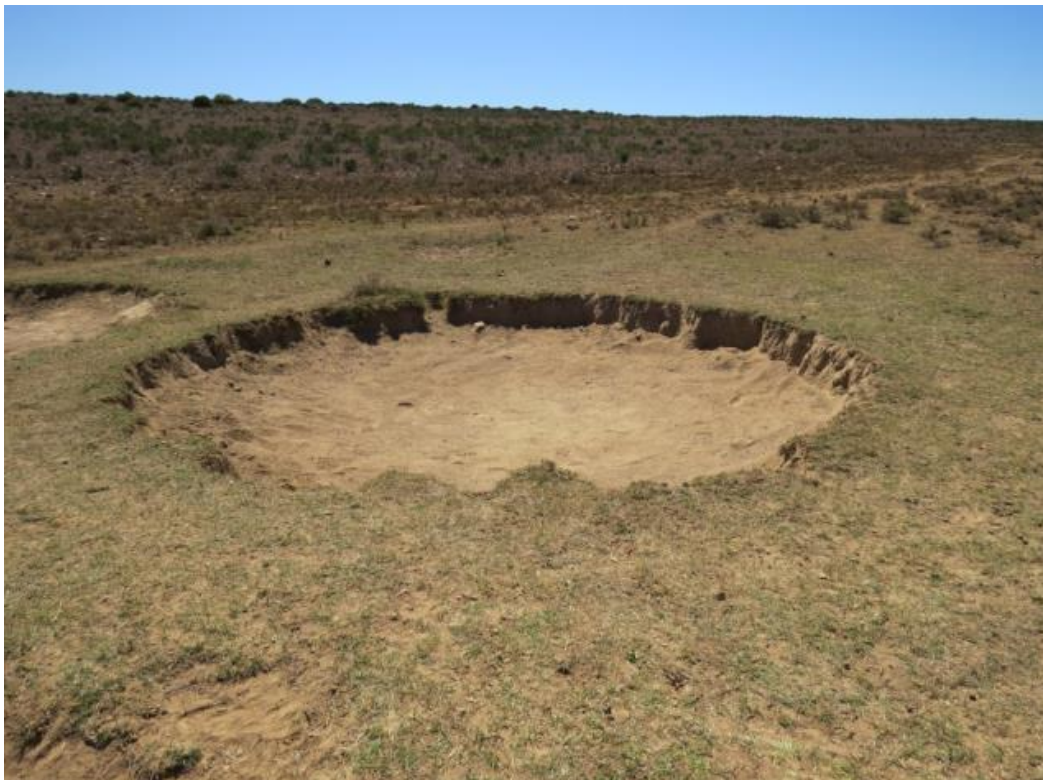

f. Dessicated wetland seep, intense use by wildlife (-32.21682222 / 25.42040556)



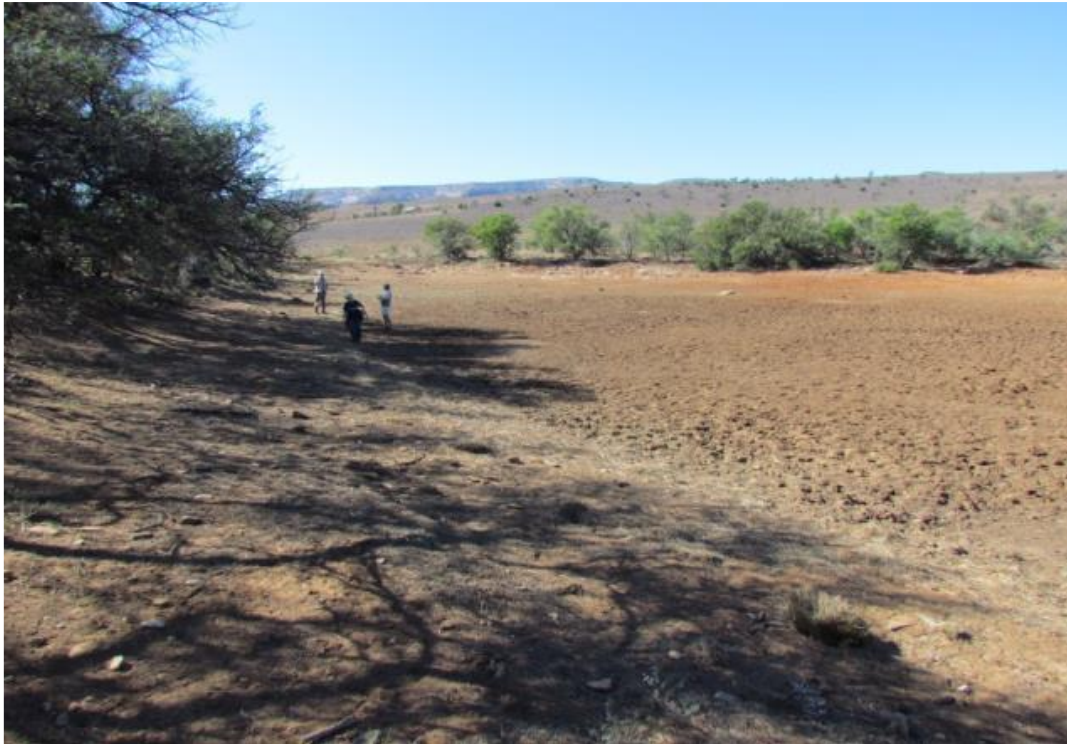

g. Ephemeral floodplain habitat in lower catchment (-32.22009167 / 25.45998056)

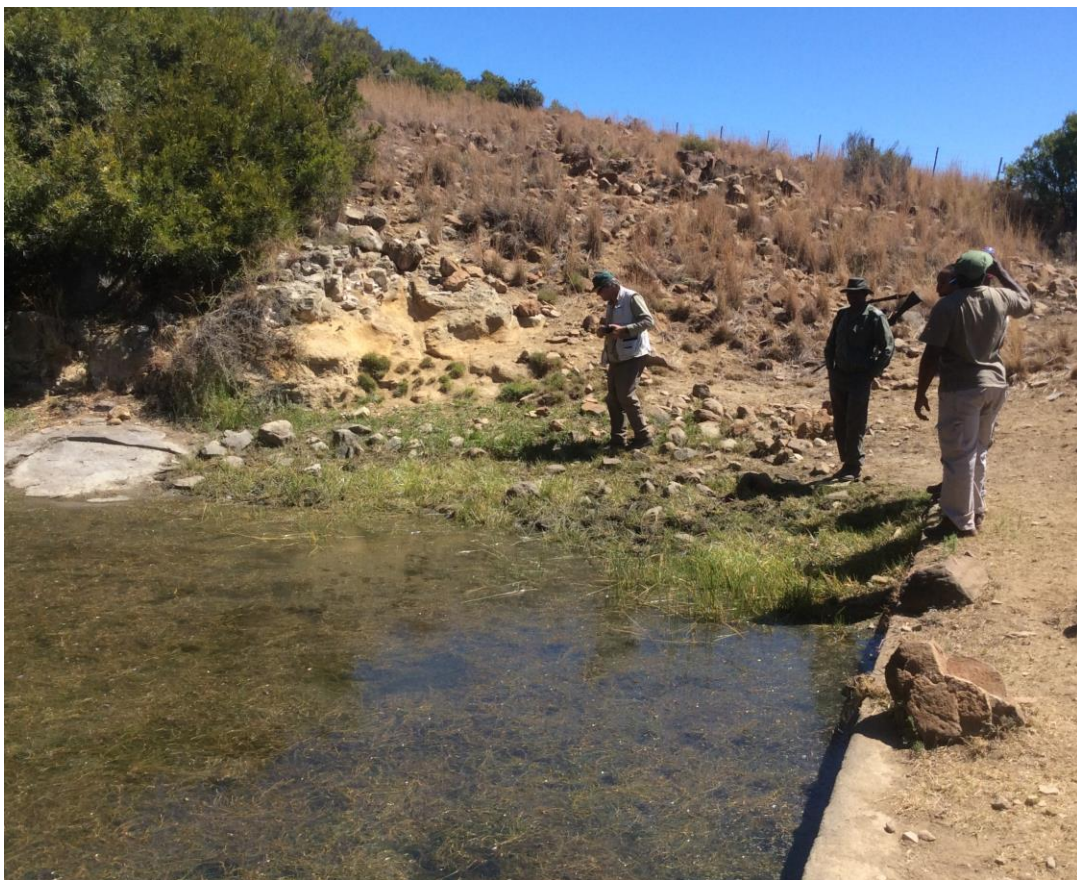

h. A mid-catchment spring in MZNP (-32.21903611 / 25.48664444)
